# Supplementary material
Source: publisher figshare collection journal article supplement (https://gsajournals.figshare.com/ndownloader/files/21191802)
Supplement: Supplementary file 1 [file 21191802]

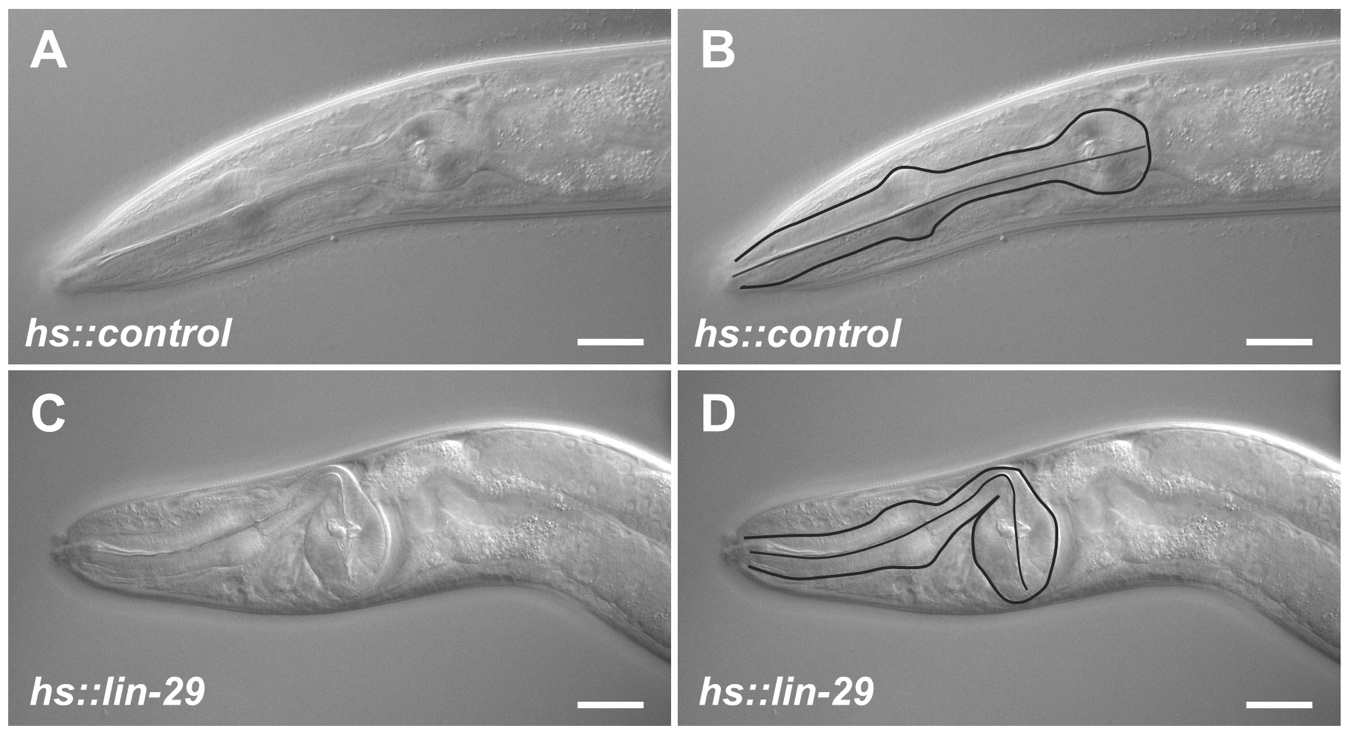


**Figure S2. Small animals resulting from ectopic early expression of LIN-29 have a bent pharynx phenotype.** Synchronized*hs::control* and *hs::lin-29* L1 animals were fed at 20°C, given single heat shock pulses in the L2 and L4 stages and allowed to grow to adulthood. The head regions of a wild type *hs::control* adult (A) and a Small *hs::lin-29* adult (C) are shown. In (B) and (D) the same animals are shown with the outline of the pharynx drawn in. Scale bar: 20µm.
